# Supplementary material for: Construction of a selective electrochemical sensing solid–liquid interface for the selective detection of fluoride ion in water with bis(indolyl)methane-functionalized multi-walled carbon nanotubes
Source: Royal Society of Chemistry journal article supplement (doi:10.1039/c7nj02794j), 2017-01-01
Supplement: c7nj02794j1.pdf [file c7nj02794j1.pdf]

## Supporting information

### **Building selective electrochemical sensing solid-liquid interface for fluoride ion in water with bis(indolyl)methane-functionalized multi-walled carbon nanotubes**

Yue Ni <sup>a,b</sup>, Hong Liu <sup>a</sup>, Jian Xu <sup>a</sup>, Ying Yue <sup>a,\*</sup>, Shijun Shao <sup>a,\*</sup>

*<sup>a</sup> CAS Key Laboratory of Chemistry of Northwestern Plant Resources of CAS and Key Laboratory for Natural Medicine of Gansu Province, Lanzhou institute of Chemical Physics, Chinese Academy of Sciences, Lanzhou 730000, P. R. China.*

*<sup>b</sup> University of Chinese Academy of Sciences, Beijing 100049, P. R. China.*

\* Corresponding author:

Ying Yue, Tel: +86-931-4968202; E-mail: yueying0421@licp.cas.cn

Shijun Shao, Tel: +86-931-4968209; E-mail: sjshao@licp.cas.cn

**Table S1** Comparison of present work with several modified electrode for F<sup>-</sup> detection.

| Electrode/Material                     | LOD               | Selectivity                                                                                                                                                                                                                                                               | Reproducibility (RSD) | Stability                                                 | Linear range      | Sensitivity                                        | Reference |
|----------------------------------------|-------------------|---------------------------------------------------------------------------------------------------------------------------------------------------------------------------------------------------------------------------------------------------------------------------|-----------------------|-----------------------------------------------------------|-------------------|----------------------------------------------------|-----------|
| SPOSi/SWCNTs/GCE                       | 0.083 $\mu$ M     | Cl <sup>-</sup> , Br <sup>-</sup> , I <sup>-</sup> , HSO <sub>3</sub> <sup>-</sup> , NO <sub>3</sub> <sup>-</sup> , ClO <sub>4</sub> <sup>-</sup> , AcO <sup>-</sup> , HCO <sub>3</sub> <sup>-</sup> , H <sub>2</sub> PO <sub>4</sub> <sup>-</sup> , AA, UA, glucose, Cys | 2.5%                  | Intraday: less than 2%;<br>interday: less than 7%         | 0.5-10 $\mu$ M    | -                                                  | 1         |
| H <sub>2</sub> Q'/DMF-TBAP-HEPES/GCE   | 23.8 $\mu$ M      | NaI, NaCl, NaBr, KH <sub>2</sub> PO <sub>4</sub> , Na <sub>2</sub> HPO <sub>4</sub> , LiClO <sub>4</sub> , NaOAc, NaNO <sub>3</sub> , KCN, NaN <sub>3</sub>                                                                                                               | 3.22%<br>3.44%        | Highly stable under thermal and ultrasonication condition | 23.8-1190 $\mu$ M | -                                                  | 2         |
| MH <sub>2</sub> Q'/DMF-TBAP-HEPES/GCE  | 2.37 $\mu$ M      | Na <sub>2</sub> HPO <sub>4</sub> , LiClO <sub>4</sub> , NaOAc, NaNO <sub>3</sub> , KCN, NaN <sub>3</sub>                                                                                                                                                                  | 3.44%                 | Highly stable under thermal and ultrasonication condition | 2.37-960 $\mu$ M  | -                                                  | 2         |
| CdO-Fe <sub>2</sub> O <sub>3</sub> NCs | 1.8 $\pm$ 0.02 nM | ethanol, acetone, chloride, bicarbonate, acetate, sulphate,                                                                                                                                                                                                               | 3.5%                  | 92% of initial sensitivity                                | 10.0 nM-1.0 mM    | 2.170 $\mu$ A cm <sup>-2</sup> mmolL <sup>-2</sup> | 3         |

|              |     |                                                                |         |          |       |   |         |
|--------------|-----|----------------------------------------------------------------|---------|----------|-------|---|---------|
|              |     |                                                                | bromide |          |       |   |         |
| Nbim/MWCNTs/ | 0.1 | NO <sub>3</sub> <sup>-</sup> ,                                 | 3.6%    | over 92% | 1–130 | – | Present |
| GCE          | μM  | HCO <sub>3</sub> <sup>-</sup> ,                                |         | remained | μM    |   | work    |
|              |     | SO <sub>4</sub> <sup>2-</sup> ,                                |         | after    |       |   |         |
|              |     | HPO <sub>4</sub> <sup>2-</sup> ,                               |         | storage  |       |   |         |
|              |     | H <sub>2</sub> PO <sub>4</sub> <sup>-</sup> , I <sup>-</sup> , |         | for 1    |       |   |         |
|              |     | AcO <sup>-</sup> ,                                             |         | month    |       |   |         |
|              |     | CO <sub>3</sub> <sup>2-</sup> , Br <sup>-</sup> ,              |         |          |       |   |         |
|              |     | HSO <sub>4</sub> <sup>-</sup>                                  |         |          |       |   |         |

---

## References

1. J. Tao, P. Zhao, Y. H. Li, W. J. Zhao, Y. Xiao and R. H. Yang, *Anal. Chim. Acta*, 2016, **918**, 97-102.
2. V. Mani, W. Y. Li, J. A. Gu, C. M. Lin, S. T. Huang, *Talanta*, 2015, **131**, 121-126.
3. M. M. Rahman, S. B. Khan, A. M. Asiri, *Microchim Acta*, 2015, **182**, 487-494.

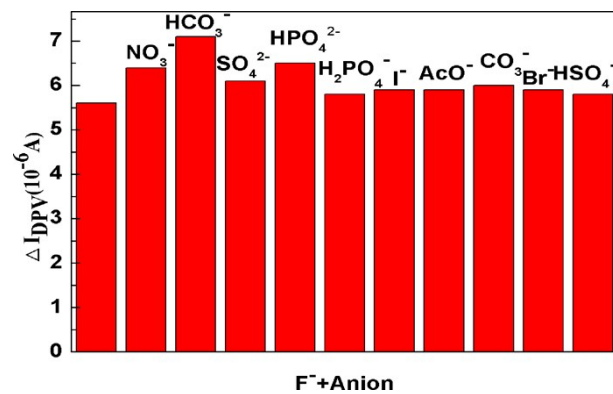

Fig. S1 The response ( $\Delta I_{DPV}$ ) of Nbim/MWCNTs/GCE to mixed-anion (100  $\mu$ M) in 5 mM  $K_3Fe(CN)_6$  containing 0.1 M KCl.
